# Supplementary material
Source: PubMed Central journal article supplement (PMC6301008)
Supplement: NIHMS1501956-supplement-13361_2018_2026_MOESM1_ESM.pdf [file NIHMS1501956-supplement-13361_2018_2026_MOESM1_ESM.pdf]

## Supplemental Material

for

### Operation and Performance of a Mass-Selective Cryogenic Linear Ion Trap

Larry F. Tesler, Adam P. Cismesia, Matthew R. Bell, Laura S. Bailey, Nicolas C. Polfer\*

Department of Chemistry, University of Florida, P.O. Box 117200, Gainesville, FL 32611-7200,  
United States

\*Correspondence to: Nicolas C. Polfer; e-mail: [polfer@chem.ufl.edu](mailto:polfer@chem.ufl.edu)

1. Pressure profile in the vacuum chamber after injecting Helium into the cryoLIT
2. Determination of  $A_2$  via fitting of the multipole expansion
3. Calculating the thermal contraction of the radius in the cryoLIT

## 1. Pressure profile in the vacuum chamber after injecting Helium into the cryoLIT

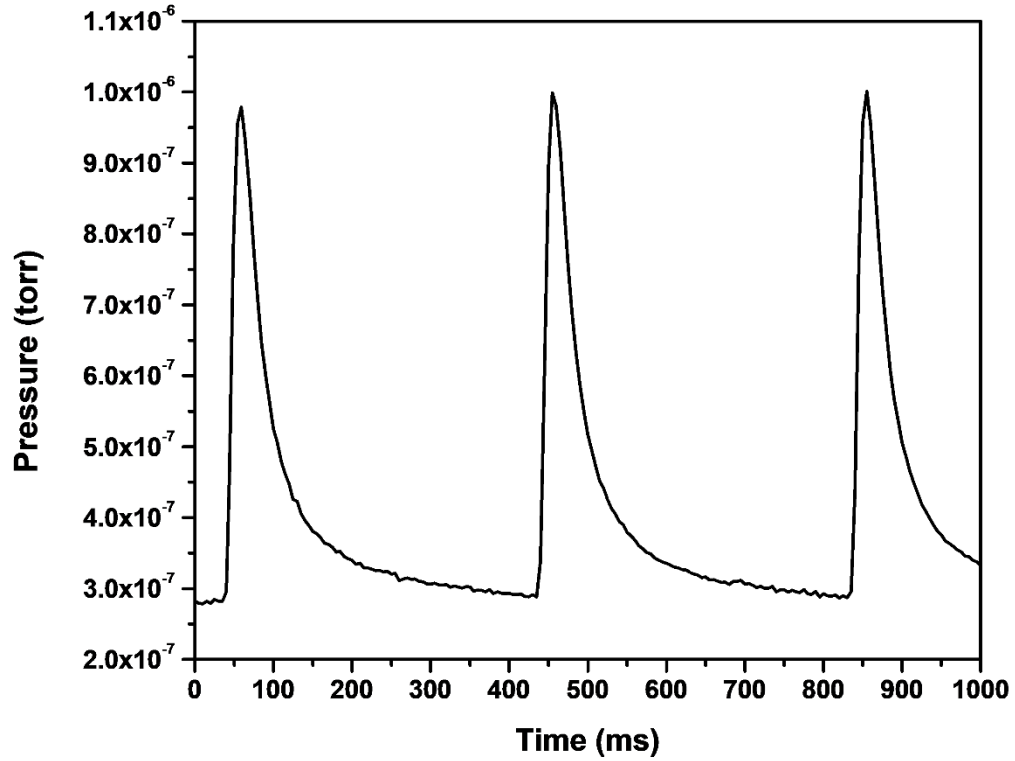

Figure S1. Pressure inside of the vacuum chamber during 3 Helium gas pulses into the cryoLIT, as monitored by an Extorr XT100 residual gas analyzer.

## 2) Determination of $A_2$ via fitting of the multipole expansion

For a two dimensional linear ion trap, the electric potential,  $\phi$ , at any point inside of the trap can be approximated by a multipole expansion [1]:

$$\phi(r, \theta) = \phi_0 \sum_{n=0}^{\infty} \left(\frac{r}{r_N}\right)^n (A_n \cos(n\theta) + B_n \sin(n\theta)) \quad \text{Eq. S1}$$

Where  $r$  and  $\theta$  are the distance and angle from the center of the trap,  $r_N$  and  $\phi_0$  are the normalization radius of the trap and the field-free potential of the trap, and  $n$  is the index of multipole (*i.e.* quadrupole, hexapole, etc.).  $A_2$  can be obtained by fitting Eq. S1 to the trap

potential using the method described by Barlow [2]: Using SIMION 8.0, a set of potentials are sampled from a ring of 40 points, 1 mm away from the center of the trap. Since  $r$  is fixed at 1mm and  $r_N$  is the y-radius of the trap, 0.20" (5.08 mm), the potentials only vary as a function of  $\theta$ . As an initial guess,  $\phi_0$  is estimated to be the average of the 40 potentials. Using Excel's Data Analysis Toolpak to minimize the square differences between the sampled potentials and Eq.S1,  $\phi_0$ ,  $A_n$ , and  $B_n$  are found. An additional constraint can be placed by setting all  $B_n$  values to 0, but this was not used in this paper. This method calculates the cryoLIT's  $A_2$  to be equal to 0.866. All other calculated  $A_n$  values are tabulated in Table S1.

*Table S1. Calculated  $A_n$  values for the cryoLIT using the multipole expansion fitting method.*

| $A_0$ | $A_1$    | $A_2$ | $A_3$    | $A_4$  | $A_5$   | $A_6$  | $A_7$ | $A_8$ |
|-------|----------|-------|----------|--------|---------|--------|-------|-------|
| 0.261 | 0.000860 | 0.866 | 0.000165 | -0.164 | -0.0370 | 0.0517 | 0.238 | 2.75  |

### 3) Calculating the thermal contraction of the radius in the cryoLIT

To calculate the change in radius in either the x or y direction of the cryoLIT, the thermal contraction,  $\frac{\Delta L}{L}$ , of both the rf electrodes and the DC endplate must be considered. The rf electrodes undergo thermal contraction, and thus increase the trap radius, by  $\frac{\Delta L}{L} * \frac{L_{rf}}{2}$ , where  $L_{rf}$  is the thickness of the rf electrode in either the x or y direction; the factor of  $\frac{1}{2}$  comes from the fact that only the interior side of the electrode contributes to the trap radius. While the rf electrodes shrink, the DC endplate mounting holes, which keep the rf electrodes in place, contract towards the center of the trap by  $\frac{\Delta L}{L} * L_m$ , where  $L_m$  is the distance from the center of the mounting hole to the center of the cryoLIT. Thus the change in the cryoLIT radius can be calculated with the following equation:

$$\Delta r = \frac{\Delta L}{L} \left( L_m - \frac{L_{rf}}{2} \right) \quad \text{Eq. S2}$$

Note,  $\frac{\Delta L}{L}$  is a negative number, so the trap radius does in fact decrease as  $L_m$  is greater than  $L_{rf}$ .

The calculations for the change in radius in the x and y directions are shown below:

$$\left( \frac{\Delta r}{r} \right)_x = \frac{\frac{\Delta L}{L} \left( L_{mx} - \frac{L_{rfx}}{2} \right)}{r_x} = \frac{-0.00202 \times \left( 0.353 \text{ in} - \frac{0.230}{2} \text{ in} \right)}{0.240 \text{ in}} \times 100\% = -0.200\% \quad \text{Eq. S3}$$

$$\left( \frac{\Delta r}{r} \right)_y = \frac{\frac{\Delta L}{L} \left( L_{my} - \frac{L_{rfy}}{2} \right)}{r_y} = \frac{-0.00202 \times \left( 0.313 \text{ in} - \frac{0.230}{2} \text{ in} \right)}{0.200 \text{ in}} \times 100\% = -0.200\% \quad \text{Eq. S4}$$

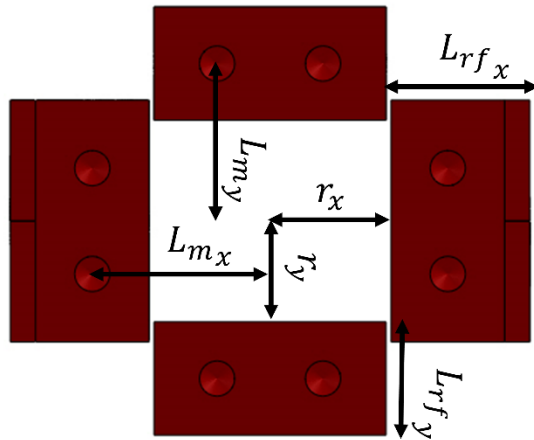

Figure S2. Dimensions used in the calculation of trap shrinking.

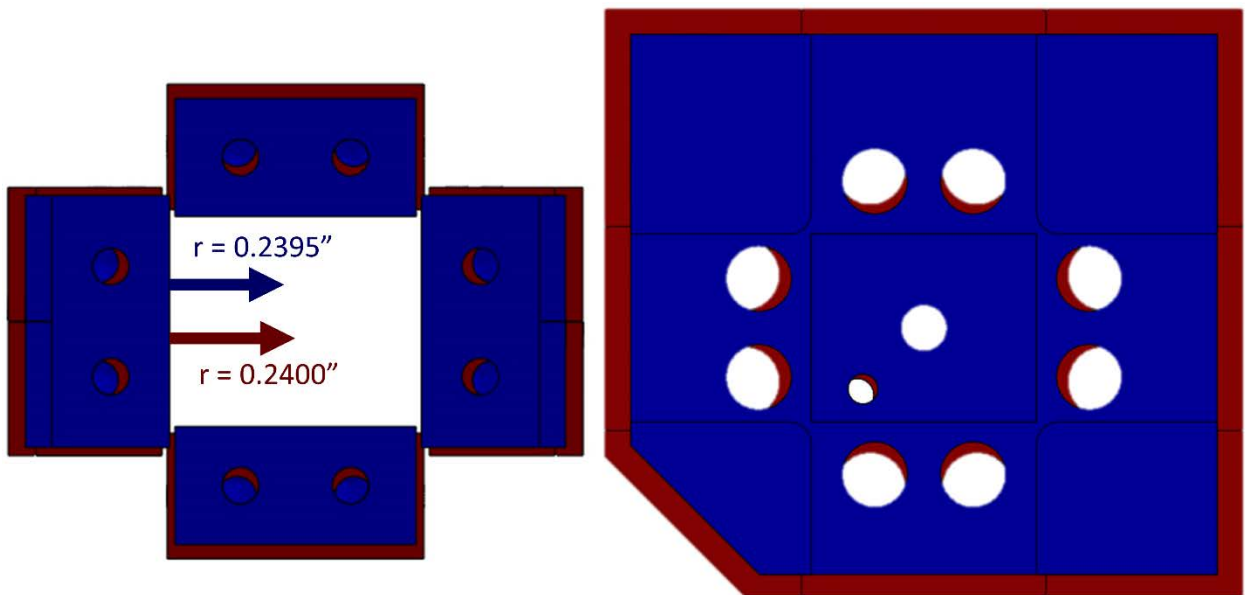

Figure S3. Illustration of the thermal contraction undergone when the cryoLIT is cooled. The contraction of the mounting holes of the DC endplate (right), at cryogenic temperature, causes the rf rods (left) to move inwards, decreasing the trap radius. Note the contraction here is magnified 20 fold.

## Bibliography

1. Krishnaveni, A., Verma, N.K., Menon, A.G., Mohanty, A.K.: Numerical observation of preferred directionality in ion ejection from stretched rectilinear ion traps. *Int. J. Mass Spectrom. Ion Process.* 275, 11–20 (2008). doi:10.1016/j.ijms.2008.05.011
2. Barlow, S.E., Taylor, A.E., Swanson, K.: Determination of analytic potentials from finite element computations. *Int. J. Mass Spectrom. Ion Process.* 207, 19–29 (2001). doi: 10.1016/S1387-3806(00)00452-8
